# Supplementary material for: C-C Chemokine Receptor 2 (CCR2) Regulates the Hepatic Recruitment of Myeloid Cells That Promote Obesity-Induced Hepatic Steatosis
Source: PubMed Central journal article supplement — Diabetes. 2010 Jan 26;59(4):916–25. doi: 10.2337/db09-1403 (PMC2844839; doi:10.2337/db09-1403), 2010-01-26
Supplement: supp_db09-1403_db09-1403_online_appendix.pdf [file supp_db09-1403_db09-1403_online_appendix.pdf]

# Supplementary Tables and Figures

## CCR2 regulates the hepatic recruitment of myeloid cells that promote obesity-induced hepatic steatosis

Amrom E. Obstfeld, Eiji Sagaru, Marie Thearle, Ann-Marie Francisco, Constance Gayet, Henry N. Ginsberg, Eleanore V. Ables, Anthony W. Ferrante Jr

Supplemental Table 1 Chemokine receptor correlation with body mass

| Genbank   | Name                                    | Gene          | r          | P Value |
|-----------|-----------------------------------------|---------------|------------|---------|
| NM_009915 | chemokine (C-C motif) receptor 2        | <i>Ccr2</i>   | 0.4626356  | 0.01    |
| NM_009911 | chemokine (C-X-C motif) receptor 4      | <i>Cxcr4</i>  | 0.2187263  | >.05    |
| ---       | chemokine-like receptor 1               | <i>Cmklr1</i> | 0.2065287  | >.05    |
| NM_017466 | chemokine (C-C motif) receptor-like 2   | <i>Ccr12</i>  | 0.100153   | >.05    |
| NM_009914 | chemokine (C-C motif) receptor 3        | <i>Ccr3</i>   | 0.0947937  | >.05    |
| NM_011798 | chemokine (C motif) receptor 1          | <i>Xcr1</i>   | 0.0903048  | >.05    |
| NM_021609 | chemokine binding protein 2             | <i>Ccbp2</i>  | 0.0633085  | >.05    |
| NM_009917 | chemokine (C-C motif) receptor 5        | <i>Ccr5</i>   | 0.0550358  | >.05    |
| NM_009913 | chemokine (C-C motif) receptor 9        | <i>Ccr9</i>   | 0.050005   | >.05    |
| NM_009917 | chemokine (C-C motif) receptor 5        | <i>Ccr5</i>   | 0.0496397  | >.05    |
| NM_007718 | chemokine (C-C motif) receptor 1-like 1 | <i>Ccr11</i>  | 0.048858   | >.05    |
| NM_009912 | chemokine (C-C motif) receptor 1        | <i>Ccr1</i>   | 0.0175567  | >.05    |
| NM_007720 | chemokine (C-C motif) receptor 8        | <i>Ccr8</i>   | 0.0049005  | >.05    |
| NM_009835 | chemokine (C-C motif) receptor 6        | <i>Ccr6</i>   | -0.0046136 | >.05    |
| NM_009916 | chemokine (C-C motif) receptor 4        | <i>Ccr4</i>   | -0.0414812 | >.05    |
| NM_007719 | chemokine (C-C motif) receptor 7        | <i>Ccr7</i>   | -0.113356  | >.05    |
| NM_009917 | chemokine (C-C motif) receptor 5        | <i>Ccr5</i>   | -0.2096656 | >.05    |
| NM_145700 | chemokine (C-C motif) receptor-like 1   | <i>Ccr11</i>  | -0.2375284 | >.05    |
| NM_007722 | chemokine orphan receptor 1             | <i>Cmkr1</i>  | -0.2576402 | >.05    |
| NM_009987 | chemokine (C-X3-C) receptor 1           | <i>Cx3cr1</i> | -0.2967323 | 0.05    |
| NM_009910 | chemokine (C-X-C motif) receptor 3      | <i>Cxcr3</i>  | -0.5354881 | 0.001   |

Supplemental Table 2: Chemokine correlation with body mass

| Genbank   | Name                                                                                                                 | Gene                                              | r          | P Value |
|-----------|----------------------------------------------------------------------------------------------------------------------|---------------------------------------------------|------------|---------|
| NM_011333 | chemokine (C-C motif) ligand 2                                                                                       | <i>Ccl2</i>                                       | 0.3946412  | 0.01    |
| NM_027294 | chemokine-like factor super family 8                                                                                 | <i>Cklfsf8</i>                                    | 0.3001117  | 0.05    |
| NM_009142 | chemokine (C-X3-C motif) ligand 1                                                                                    | <i>Cx3cl1</i>                                     | 0.2887943  | >.05    |
| NM_013652 | chemokine (C-C motif) ligand 4                                                                                       | <i>Ccl4</i>                                       | 0.2840962  | >.05    |
| NM_009137 | chemokine (C-C motif) ligand 22                                                                                      | <i>Ccl22</i>                                      | 0.2171073  | >.05    |
| NM_013655 | chemokine (C-X-C motif) ligand 12                                                                                    | <i>Cxcl12</i>                                     | 0.1629795  | >.05    |
| NM_013653 | chemokine (C-C motif) ligand 5                                                                                       | <i>Ccl5</i>                                       | 0.1471806  | >.05    |
| NM_021443 | chemokine (C-C motif) ligand 8                                                                                       | <i>Ccl8</i>                                       | 0.1407212  | >.05    |
| NM_008176 | chemokine (C-X-C motif) ligand 1                                                                                     | <i>Cxcl1</i>                                      | 0.138592   | >.05    |
| NM_009140 | chemokine (C-X-C motif) ligand 2                                                                                     | <i>Cxcl2</i>                                      | 0.1288327  | >.05    |
| NM_008176 | chemokine (C-X-C motif) ligand 1                                                                                     | <i>Cxcl1</i>                                      | 0.0761071  | >.05    |
| NM_019568 | chemokine (C-X-C motif) ligand 14                                                                                    | <i>Cxcl14</i>                                     | 0.0714309  | >.05    |
| NM_011337 | chemokine (C-C motif) ligand 3                                                                                       | <i>Ccl3</i>                                       | 0.0590564  | >.05    |
| NM_013655 | chemokine (C-X-C motif) ligand 12                                                                                    | <i>Cxcl12</i>                                     | 0.0286748  | >.05    |
| NM_021274 | chemokine (C-X-C motif) ligand 10                                                                                    | <i>Cxcl10</i>                                     | -0.0072687 | >.05    |
| NM_009141 | chemokine (C-X-C motif) ligand 5                                                                                     | <i>Cxcl5</i>                                      | -0.0195215 | >.05    |
| NM_011329 | chemokine (C-C motif) ligand 1                                                                                       | <i>Ccl1</i>                                       | -0.0243389 | >.05    |
| NM_011331 | chemokine (C-C motif) ligand 12                                                                                      | <i>Ccl12</i>                                      | -0.0277421 | >.05    |
| NM_011330 | small chemokine (C-C motif) ligand 11                                                                                | <i>Ccl11</i>                                      | -0.0407867 | >.05    |
| NM_153582 | Chemokine-like factor super family 4                                                                                 | <i>Cklfsf4</i>                                    | -0.0437703 | >.05    |
| NM_013654 | chemokine (C-C motif) ligand 7                                                                                       | <i>Ccl7</i>                                       | -0.1000884 | >.05    |
| NM_008599 | chemokine (C-X-C motif) ligand 9                                                                                     | <i>Cxcl9</i>                                      | -0.1288588 | >.05    |
| NM_026036 | chemokine-like factor super family 6                                                                                 | <i>Cklfsf6</i>                                    | -0.1479583 | >.05    |
| NM_018866 | chemokine (C-X-C motif) ligand 13                                                                                    | <i>Cxcl13</i>                                     | -0.1526731 | >.05    |
| NM_009142 | chemokine (C-X3-C motif) ligand 1                                                                                    | <i>Cx3cl1</i>                                     | -0.1589876 | >.05    |
| NM_011329 | chemokine (C-C motif) ligand 1                                                                                       | <i>Ccl1</i>                                       | -0.1852904 | >.05    |
| NM_011338 | chemokine (C-C motif) ligand 9                                                                                       | <i>Ccl9</i>                                       | -0.2296025 | >.05    |
| NM_024217 | chemokine-like factor super family 3                                                                                 | <i>Cklfsf3</i>                                    | -0.2374132 | >.05    |
| NM_011332 | chemokine (C-C motif) ligand 17                                                                                      | <i>Ccl17</i>                                      | -0.2383486 | >.05    |
| NM_009139 | chemokine (C-C motif) ligand 6                                                                                       | <i>Ccl6</i>                                       | -0.2572483 | >.05    |
| NM_009138 | chemokine (C-C motif) ligand 25                                                                                      | <i>Ccl25</i>                                      | -0.2602967 | >.05    |
| NM_019932 | chemokine (C-X-C motif) ligand 4                                                                                     | <i>Cxcl4</i>                                      | -0.2614796 | >.05    |
| NM_011888 | chemokine (C-C motif) ligand 19                                                                                      | <i>Ccl19</i>                                      | -0.2828253 | >.05    |
| NM_011336 | chemokine (C-C motif) ligand 27                                                                                      | <i>Ccl27</i>                                      | -0.2905451 | >.05    |
| NM_008510 | chemokine (C motif) ligand 1                                                                                         | <i>Xcl1</i>                                       | -0.3000183 | 0.05    |
| NM_013655 | chemokine (C-X-C motif) ligand 12                                                                                    | <i>Cxcl12</i>                                     | -0.3684182 | 0.05    |
| NM_133978 | chemokine-like factor super family 7                                                                                 | <i>Cklfsf7</i>                                    | -0.3690552 | 0.05    |
| NM_011336 | chemokine (C-C motif) ligand 27                                                                                      | <i>Ccl27</i>                                      | -0.4151852 | 0.01    |
| ---       | chemokine (C-C motif) ligand 21b /// chemokine (C-C motif) ligand 21a /// chemokine (C-C motif) ligand 21c (leucine) | <i>Ccl21b</i> /// <i>Ccl21a</i> /// <i>Ccl21c</i> | -0.5687912 | 0.001   |

**Table 1-2:** Correlation of expression of chemokine receptors and ligands with body mass. Microarray data derived from livers of 45 mice demonstrate correlation of *Ccr2* and *Ccl2* with body mass. Correlations are measured by pearson correlation.

Supplemental Table 3: Acute phase genes correlation with *Ccr2* expression

| Genbank     | Name                                                                             | Gene             | r         | P Value |
|-------------|----------------------------------------------------------------------------------|------------------|-----------|---------|
| NM_031167   | interleukin 1 receptor antagonist                                                | <i>Il1rn</i>     | 0.5014487 | 0.001   |
| NM_023196   | phospholipase A2, group XIIA                                                     | <i>Pla2g12a</i>  | 0.485602  | 0.001   |
| NM_008458   | serine (or cysteine) peptidase inhibitor, clade A, member 3C                     | <i>Serpina3c</i> | 0.4842194 | 0.001   |
| NM_011016   | orosomucoid 2                                                                    | <i>Orm2</i>      | 0.4616396 | 0.01    |
| NM_011314   | serum amyloid A 2                                                                | <i>Saa2</i>      | 0.395184  | 0.01    |
| NM_008489   | lipopolysaccharide binding protein                                               | <i>Lbp</i>       | 0.3805643 | 0.01    |
| NM_007576   | complement component 4 binding protein                                           | <i>C4bp</i>      | 0.3687146 | 0.05    |
| NM_008198   | complement factor B                                                              | <i>Cfb</i>       | 0.3641171 | 0.05    |
| NM_023196   | phospholipase A2, group XIIA                                                     | <i>Pla2g12a</i>  | 0.3389597 | 0.05    |
| NM_011314   | serum amyloid A 2                                                                | <i>Saa2</i>      | 0.3374719 | 0.05    |
| NM_177091.3 | fibronectin type III domain containing 7                                         | <i>Fndc7</i>     | 0.3185578 | 0.05    |
| NM_013737   | phospholipase A2, group VII (platelet-activating factor acetylhydrolase, plasma) | <i>Pla2g7</i>    | 0.3163691 | 0.05    |
| NM_011316   | serum amyloid A 4                                                                | <i>Saa4</i>      | 0.312971  | 0.05    |
| NM_010554   | interleukin 1 alpha                                                              | <i>Il1a</i>      | 0.4504065 | 0.01    |
| NM_013693   | tumor necrosis factor alpha                                                      | <i>Tnf</i>       | 0.305358  | 0.05    |
| NM_031168   | interleukin 6                                                                    | <i>Il6</i>       | 0.3601626 | 0.05    |
| NM_008361   | interleukin 1, beta                                                              | <i>Il1b</i>      | 0.3131237 | 0.05    |

**Table 3:** Correlation of expression of *Ccr2* and various acute phase response genes and cytokines in liver.

## Supplemental Table 4 - PCR Primers

| Gene            | Primers                              |
|-----------------|--------------------------------------|
|                 | 5'-TGCCATCATAAAGGAGCCA -3'           |
| <i>Ccr2</i>     | 5'-AGCACATGTGGTGAATCCAA -3'          |
|                 | 5'-AGGTCCCTGTCATGCTCTGG-3'           |
| <i>Ccl2</i>     | 5'-CTGCTGCTTGGTGATCCTCTTG-3'         |
|                 | 5'-CCAGACCCTCAGCTCAGATCA-3'          |
| <i>Tnf</i>      | 5'-CACTTGGTGGTTTGCTACGAC-3'          |
|                 | 5'-CTTTGGCTATGGGCTTCCAGTC-3'         |
| <i>Emr1</i>     | 5'-GCAAGGAGGACAGAGTTTATCGTG-3'       |
|                 | 5'-ATTCGGTGATCCCTTGGATT -3'          |
| <i>Itgam</i>    | 5'-GTTTGTTGAAGGCATTTCCC -3'          |
|                 | 5'-AAG GGC TGG CAT TGT CTC TAA-3'    |
| <i>Icam1</i>    | 5'-CTC CTC AGT CAC CTC TAC CAA GG-3' |
|                 | 5'-GCA AAG TGG AAT CAA ACC GTA-3'    |
| <i>Vcam1</i>    | 5'-GAA GGG GAG TCA CAG CCA ATA G-3'  |
|                 | 5'-TCT GGG TAC AAG ATC CCT GAA -3'   |
| <i>Chi3l3</i>   | 5'-TTT CTC CAG TGT AGC CAT CCT T -3' |
|                 | 5'-GCTTCGGCTCAGGGTCTAC -3'           |
| <i>Jag1</i>     | 5'-GGCGAAACTGAAAGGCGAGTA -3'         |
|                 | 5'-TACAGCTCCACGCTATGGATT-3'          |
| <i>Mrc2</i>     | 5'-CACTCTCCAGTTGAGGTACT-3'           |
|                 | 5'-CTCCAAGCCAAAGTCCTTAGAG-3'         |
| <i>Arg1</i>     | 5'-AGGAGCTGTATTAGGGACATC-3'          |
|                 | 5'-GCTCTCGTCCTTCTCTCA -3'            |
| <i>Ppargc1b</i> | 5'-GAGGTCAAGCTCTGGCAAGT -3'          |
|                 | 5'-GCGACATGATTAATGGCACA -3'          |
| <i>Cd36</i>     | 5'-CCTGCAAATGTCAGAGGAAA -3'          |
|                 | 5'-TTTGGCTCCAGAGTTTGACC -3'          |
| <i>Lpl</i>      | 5'-TGTGTCTTCAGGGGTCCTTAG -3'         |
|                 | 5'-GGTACATGTGGGAGTACCCG -3'          |
| <i>Acadl</i>    | 5'-TCTTGCGATCAGCTCTTTCA -3'          |
|                 | 5'-GCTCGTGAGCACATTGAAA-3'            |
| <i>Acadm</i>    | 5'-CATTGTCCAAAGCCAAACC-3'            |
|                 | 5'-CCCGTATTTGAGATCCGTGT-3'           |
| <i>Adfp</i>     | 5'-TAGGTATTGGCAACCGCAAT-3'           |
|                 | 5'-CTA CAC GGA GGA AGA AGC CAA G -3' |
| <i>Cyc1</i>     | 5'-AGC CAG TGA GCA GGG AAA ATA C -3' |
|                 | 5'-GCATTCCTTCCCATTGACAC-3'           |
| <i>Cpt1a</i>    | 5'-TACAGGTGCTGGTGCTTTTAC-3'          |
|                 | 5'-TGCCTGGATGAAGTTTGATG -3'          |
| <i>Pck1</i>     | 5'-TCTGGATGGTTTTAATGGCA -3'          |
|                 | 5'-ACTGTGGGCATCAATCTCCT -3'          |
| <i>G6pc</i>     | 5'-GTGTCCAGGACCCACCAATA -3'          |
|                 | 5'-TCTTTCTAACAACCACCTCTGG-3'         |
| <i>Fasn</i>     | 5'-CTTCACGACTCCATCACGAATG-3'         |
|                 | 5'-GGTGGAAGTAGGCACAGAAGTG-3'         |
| <i>Acaca</i>    | 5'-TGTCAGGCGAATGTTGATTTTC-3'         |
|                 | 5'-CCCAAGCTTGTGAATCAAGG -3'          |
| <i>Gpam</i>     | 5'-CCTCTTCTGCCACAACATCA-3'           |
|                 | 5'-CGCAGCGAAAACAAGAATAA -3'          |
| <i>Dgat2</i>    | 5'-GAAGATGTCTTGGAGGGCTG -3'          |
|                 | 5'-GGCACTAAGTGCCCTCAACCT-3'          |
| <i>Srebf1</i>   | 5'-GCCACATAGATCTTGCCAGTGT-3'         |
|                 | 5'-GCC CTT TGG TGA CTT TAT GGA G-3'  |
| <i>Pparg</i>    | 5'-GCA GCA GGT TGT CTT GGA TG-3'     |
|                 | 5'-GAAGGGGGATCTTCAGCTTT-3'           |
| <i>Ccl8</i>     | 5'-TCTTTGCCTGCTGCTCATAG-3'           |
|                 | 5'-TTCCTCTTGGGGATCTTTG-3'            |
| <i>Ccl7</i>     | 5'-CTGCTTTCAGCATCCAAGTG-3'           |
|                 | 5'-CTTCCGGACGTGAATCTTCT-3'           |
| <i>Ccl12</i>    | 5'-AGTCCTCAGGTATTGGCTGG-3'           |
|                 | 5'-CAGCAAGTTCATCGTGTCATC-3'          |
| <i>Ppib</i>     | 5'-CTCTTCTCCTCTGTGCCATCTC-3'         |
|                 | 5'-AAACGGCTACCACATCCAAG-3'           |
| <i>18S</i>      | 5'-CCTCCAATGGATCCTCGTTA-3'           |

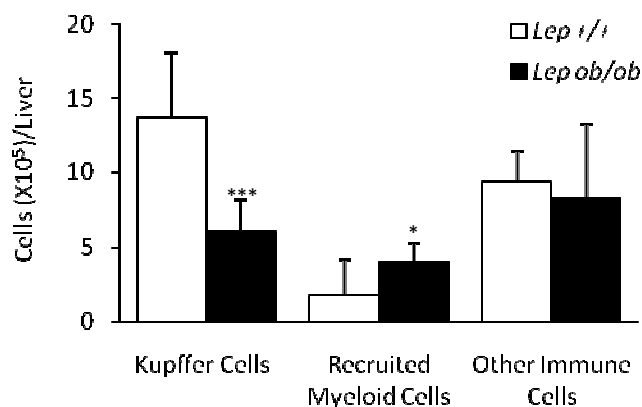

**Supplemental Figure 1:** The absolute number of Kupffer cells in livers is decreased and CD11b<sup>+</sup> F4/80<sup>dim</sup> is increased in obese (*Lep*<sup>ob/ob</sup>) compared to lean (*Lep*<sup>+/+</sup>) mice, while the total of other immune cells is unaltered by obesity.

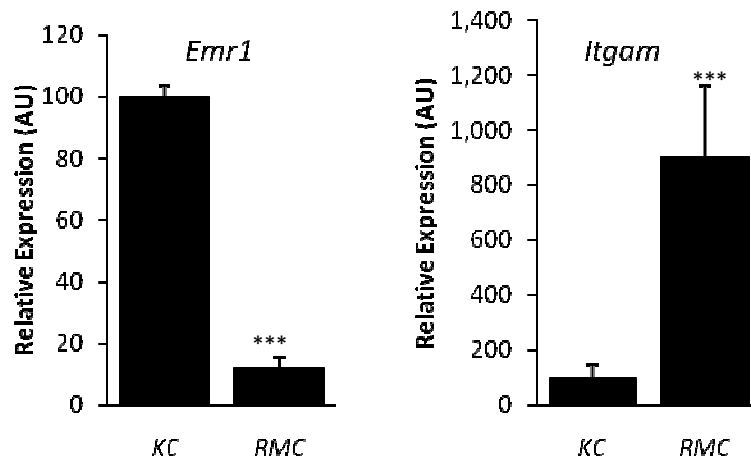

**Supplemental Figure 2:** Liver nonparenchymal cells from C57BL/6J obese *Lep*<sup>ob/ob</sup> mice and lean *Lep*<sup>+/+</sup> controls were stained with antibodies as depicted in Figure 2a, and were FACS sorted into FACS buffer. In addition to identifying cells as depicted in Figure 2b, neutrophils were removed by staining for Ly6g and gating positive cells out. RNA was extracted and quantitative PCR performed on cDNA for expression of genes that were part of the sorting criteria.

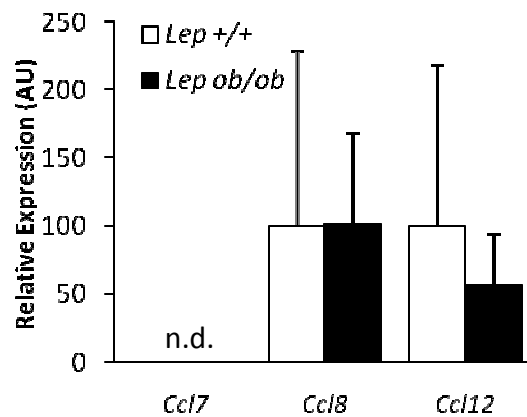

**Supplemental Figure 3:** RNA from livers used in Figure.1b were assessed for relative expression of CCR2 ligands other than Ccl2 by quantitative PCR. Ccl7 could not be detected.

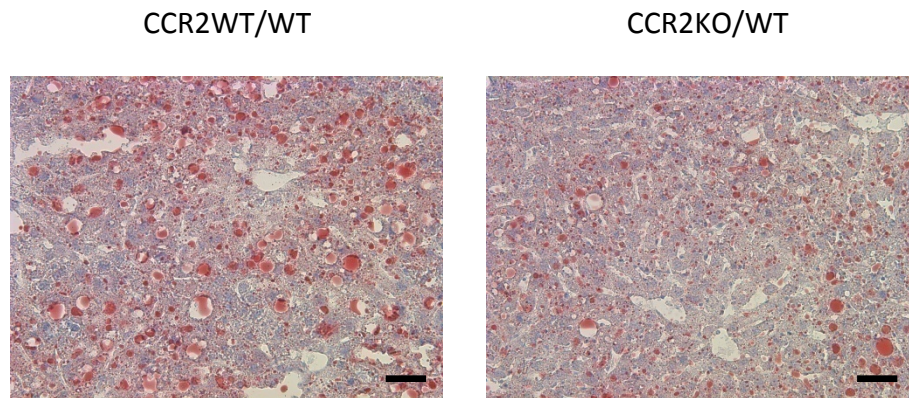

**Supplemental Figure 4:** Hematopoietic deficiency of CCR2 ameliorates HFD induced hepatosteatosis. Frozen liver sections from mice fed HFD for 36 weeks were stained with Oil red O. Bar is equivalent to 50 microns.

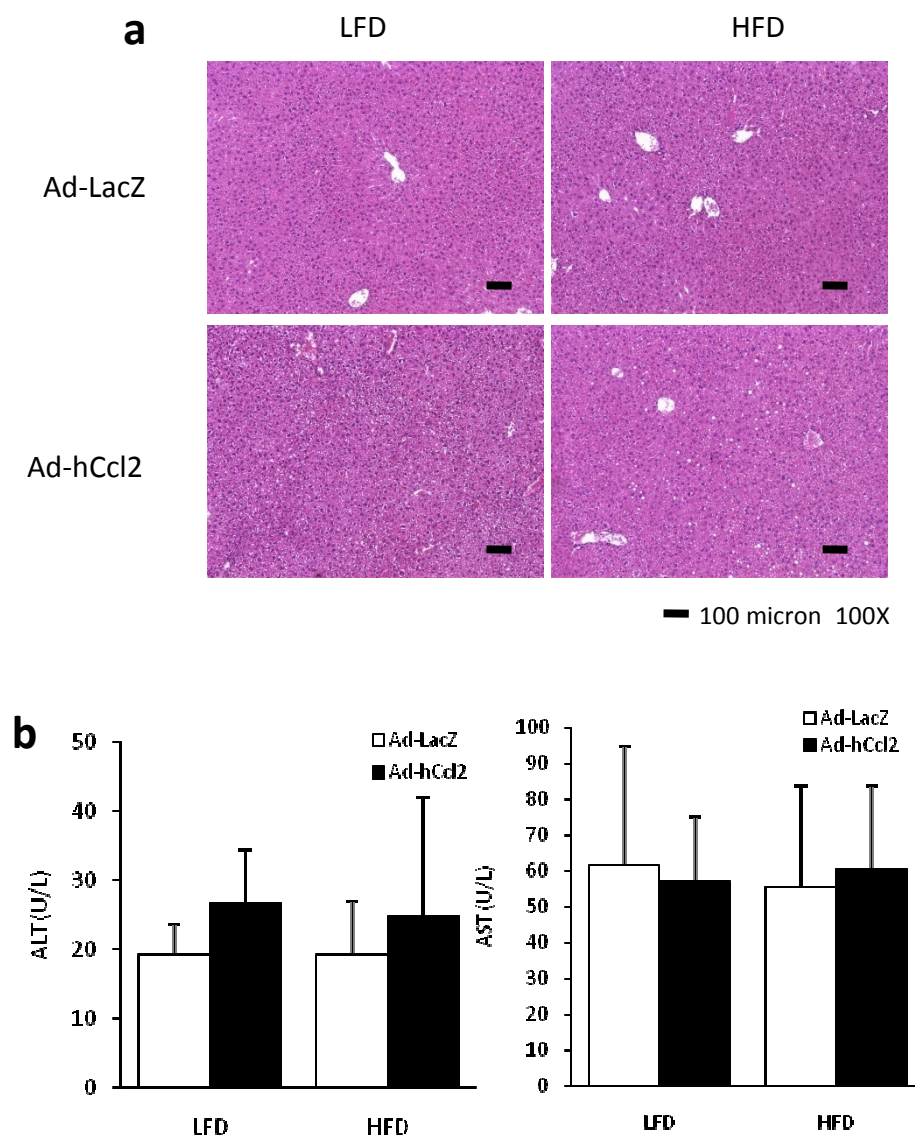

**Supplement Figure 5:** Mice injected with Ad-hCcl2 or Ad-LacZ were assessed for frank hepatitis by assessment of liver histology (a) and measurement of serum transaminases (b). Bar is equivalent to 100 microns (100X magnification). For transaminases no differences were detectable between Ad-hCcl2 and Ad-LacZ treated animals ( $p > 0.1$ )

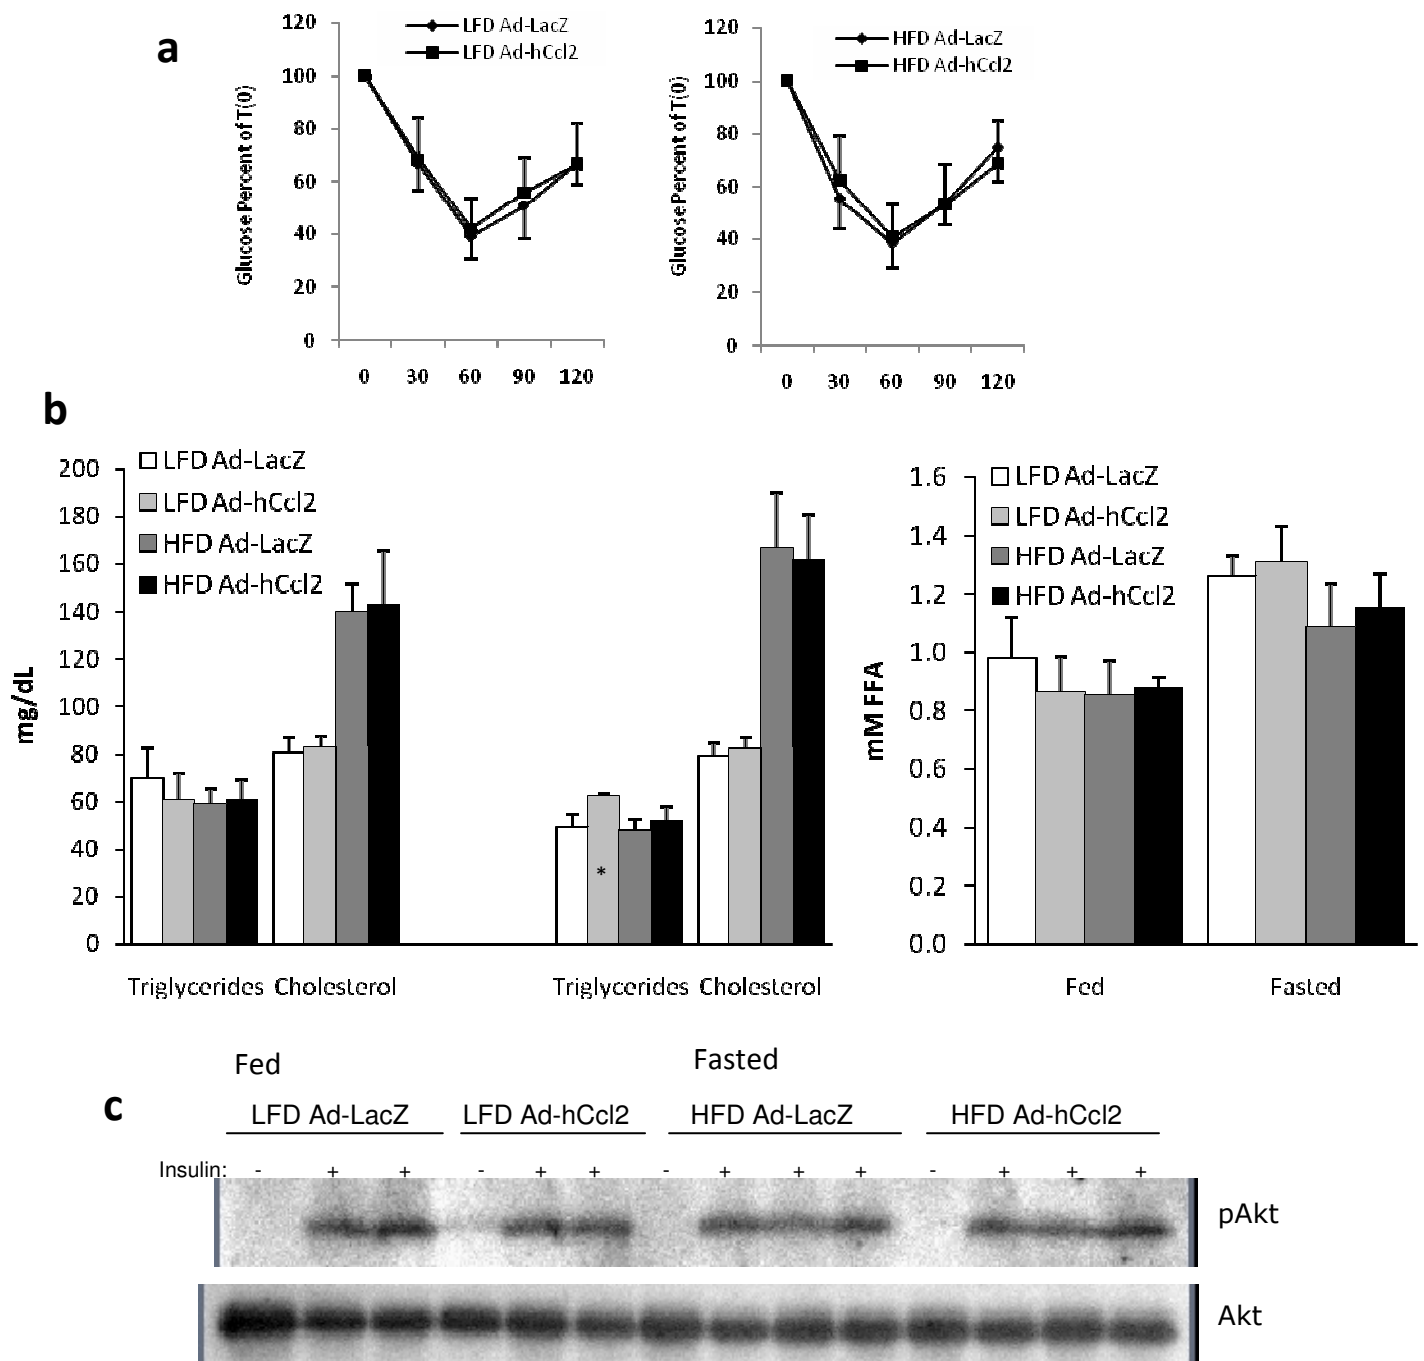

**Supplemental Figure 6:** Insulin sensitivity was not different between mice expressing *hCcl2* (Ad-*hCcl2*) or control (Ad-LacZ) virus (a). No difference was found in serum concentrations of TG, total cholesterol and free fatty acids as well (b). For total serum triglycerides, cholesterol, and free fatty acids  $p > 0.2$  (comparisons are within diet groups and between Ad-LacZ and Ad-*hCcl2* groups), except fasted TG ( $p = 0.04$ ) was higher in low fat fed mice expressing *hCcl2* compared to low fat fed control mice. Figure (c) depicts biochemical assessment of liver specific insulin sensitivity by western blotting for insulin stimulated (5 U/kg) phosphorylation of Akt (S473) and a duplicate membrane simultaneously loaded with identical amounts of total protein probed for total Akt.

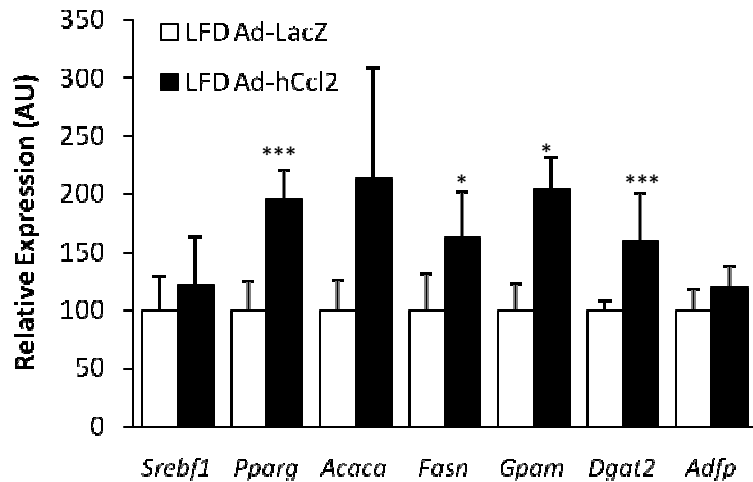

**Supplemental Figure 7:** RMC recruitment induced expression of genes involved in TG formation without changing hepatic TG mass. Mice sacrificed two weeks after adenoviral injection. Data represent mean S.D., \* -  $p < 0.05$ ; \*\* -  $p < 0.01$ ; \*\*\* -  $p < 0.005$ .

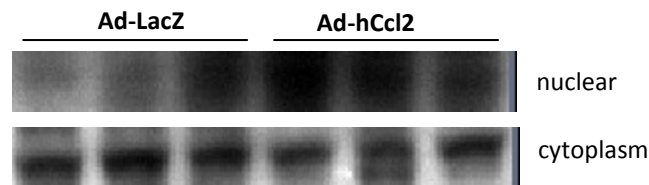

**Supplemental Figure 8:** CCL2 mediated RMC recruitment induced nuclear localization of mature form of SREBP1c in HFD mice. Nuclear and cytoplasmic fractions were isolated from whole liver, protein extracted and equal amounts of protein were probed using SREBP1c specific antibody. Mice were sacrificed three weeks after adenoviral injection.

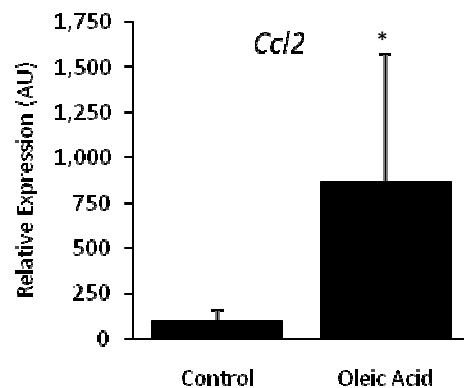

**Supplemental Figure 9:** Intravenously infused oleic acid (6 mM) or saline for 6 hours induced hepatic expression of Ccl2 expression in lean C57BL/6J mice ( $n = 4-6$ )
